# Supplementary figures and images for: The Role of Purine Metabolism-Related Genes PPAT and IMPDH1 in the Carcinogenesis of Intrahepatic Cholangiocarcinoma Based on Metabonomic and Bioinformatic Analyses
Source: Hindawi journal article supplement (doi:10.1155/2023/5141836), 2023-01-20

**A**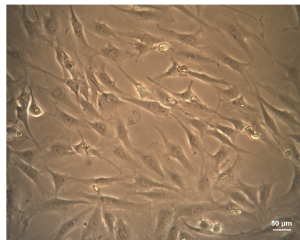**NF**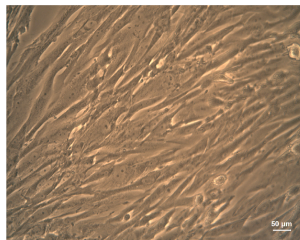**iCAF****B**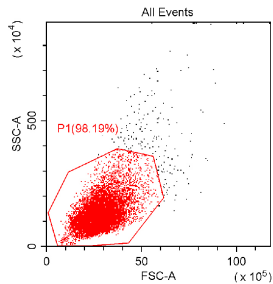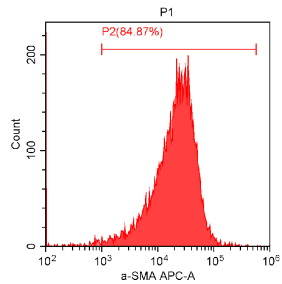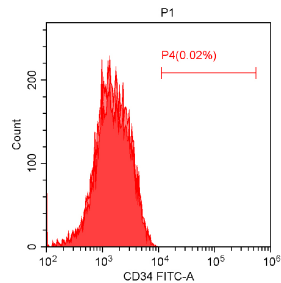**CD34**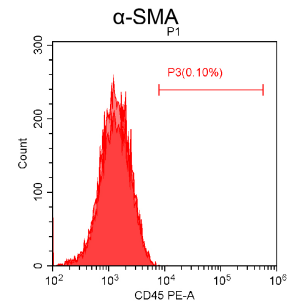**CD45**

Supplement: f1 [file 5141836.f1.zip]
